# Supplementary material for: A novel and efficient method for the olefination of carbonyl compounds with Grignard reagents in the presence of diethyl phosphite
Source: Royal Society of Chemistry journal article supplement (doi:10.1039/c001931c), 2010-01-01
Supplement: c001931c.pdf [file c001931c.pdf]

## Supporting Information

### A Novel and Efficient Method for the Olefination of Carbonyl Compounds with Grignard Reagents in the Presence of Diethyl Phosphite

Tongqiang Wang, Yuanyuan Hu, Songlin Zhang\*

*Key Laboratory of Organic Synthesis of Jiangsu Province, College of Chemistry, Chemical Engineering and Materials Science, Dushu Lake Campus, Suzhou University, Suzhou, 215123, People's Republic of China.*

[zhangsl@suda.edu.cn](mailto:zhangsl@suda.edu.cn)

**General:** Tetrahydrofuran was distilled from sodium and benzophenone immediately prior to use. All reactions were carried out under a nitrogen atmosphere. Metallic magnesium and all other solvents were purchased from commercial source, without further purification before use. The flash column chromatography was carried out on Merck silica gel (300-400 mesh).  $^1\text{H}$  and  $^{13}\text{C}$  NMR spectra were recorded on a Varian Mercury 300 or 400 MHz spectrometer as solutions in  $\text{CDCl}_3$ . Chemical shifts in  $^1\text{H}$  NMR spectra are reported in parts per million (ppm,  $\delta$ ) downfield from the internal standard  $\text{Me}_4\text{Si}$  (TMS). Chemical shifts in  $^{13}\text{C}$  NMR spectra are reported relative to the central line of the chloroform signal ( $\delta = 77.50$  ppm). High-resolution mass spectra were obtained with a GCT-TOF instrument.

**Materials:** The other chemicals were purchased from Aldrich, Alfa or Acros chemical company and used thus, without further purification. Petroleum ether (PE) used refers to the 30-60°C boiling point fraction of petroleum.

**General procedure for the synthesis of olefins:** A solution of Grignard reagents in THF (0.5 M, 2.2 mL, 1.1 mmol) was added to a solution of carbonyl compounds (0.5 mmol) in dry THF (6 mL) under a nitrogen atmosphere at room temperature. The mixture was stirred for about 30 min. Then the diethyl phosphite (0.6 mmol) was added (the reaction was monitored by TLC). The reaction mixture was stirred for 3-5 h and then was quenched with water. The resulting mixture was extracted with diethyl ether (3×10 mL), and dried over anhydrous  $\text{Na}_2\text{SO}_4$ . The solvent was removed by evaporation under reduced pressure. Purification by column chromatography on silica gel afforded olefins (300-400 mesh, petroleum ether as eluent).

**Buta-1,3-diene-1,1-diylidibenzene (entry 1)**<sup>[1]</sup> The title compound was obtained according to the general procedure. Colourless oil; Yield: 90%;  $^1\text{H}$  NMR (400 MHz,  $\text{CDCl}_3$ ):  $\delta$ : 7.38-7.17 (m, 10H), 6.71 (d,  $J = 11.1$  Hz, 1H), 6.44 (td,  $J = 10.5$  Hz,  $J = 16.9$  Hz, 1H), 5.38 (d,  $J = 16.9$  Hz, 1H), 5.11 (d,  $J = 10.1$  Hz, 1H).  $^{13}\text{C}$  NMR ( $\text{CDCl}_3$ , 75 MHz):  $\delta$ : 143.59, 142.53, 140.09, 135.41, 130.87, 128.97, 128.64, 128.63, 128.04, 127.96, 127.84, 119.08. HRMS ( $\text{EI}^+$ ) calcd for  $\text{C}_{16}\text{H}_{14}$  ( $\text{M}^+$ ): 206.1096; found: 206.1096.

**4,4'-(buta-1,3-diene-1,1-diyl)bis(chlorobenzene) (entry 2)**<sup>[1]</sup> The title compound was obtained according to the general procedure. Colourless oil; Yield: 83%;  $^1\text{H}$  NMR (300 MHz,  $\text{CDCl}_3$ ):  $\delta$ : 7.37-7.11 (m, 8H), 6.67 (d,  $J = 11.0$  Hz, 1H), 6.38 (td,  $J = 10.5$  Hz,  $J = 16.8$  Hz, 1H), 5.42 (dd,  $J = 0.9$  Hz,  $J = 16.8$  Hz, 1H), 5.18 (dd,  $J = 0.9$  Hz,  $J = 10.1$  Hz, 1H).  $^{13}\text{C}$  NMR (75 MHz,  $\text{CDCl}_3$ ):  $\delta$ : 141.06, 140.59, 137.99, 134.75, 134.02, 132.16, 129.74, 129.66, 129.22, 129.03, 128.91, 120.35. HRMS ( $\text{EI}^+$ ) calcd for  $\text{C}_{16}\text{H}_{12}^{35}\text{Cl}_2$  ( $\text{M}^+$ ): 274.0316; found: 274.0316; HRMS( $\text{EI}^+$ ) calcd for  $\text{C}_{16}\text{H}_{12}^{37}\text{Cl}_2$  ( $\text{M}^+$ ): 276.0287; found: 276.0280.

**4,4'-(buta-1,3-diene-1,1-diyl)bis(methoxybenzene) (entry 3)**<sup>[1]</sup> The title compound was obtained according to the general procedure. Colourless oil; Yield: 95%;  $^1\text{H}$  NMR (400 MHz  $\text{CDCl}_3$ ):  $\delta$  7.24-7.12 (m, 4H), 6.91 (d,  $J = 8.7$  Hz, 2H), 6.82 (d,  $J = 8.8$  Hz, 2H), 6.59 (d,  $J = 11.0$  Hz, 1H), 6.46 (td,  $J = 10.4$  Hz,  $J = 16.7$  Hz, 1H), 5.34 (dd,  $J = 1.7$  Hz,  $J = 16.7$  Hz, 1H), 5.07 (dd,  $J = 1.8$  Hz,  $J = 10.0$  Hz, 1H), 3.84 (s, 3H), 3.80 (s, 3H).  $^{13}\text{C}$  NMR ( $\text{CDCl}_3$ , 100 MHz):  $\delta$  159.63, 159.32, 142.84, 135.72, 135.55, 132.57, 132.08, 129.32, 127.17, 117.77, 113.98, 113.92, 55.75, 55.73. HRMS ( $\text{EI}^+$ ) calcd for  $\text{C}_{18}\text{H}_{18}\text{O}_2$  ( $\text{M}^+$ ): 266.1307; found: 266.1306.

**(E)-1-(buta-1,3-dienyl)-4-methoxybenzene (entry 4)**<sup>[1]</sup> The title compound was obtained according to the general procedure. Colourless oil; Yield: 82%;  $^1\text{H}$  NMR (300 MHz,  $\text{CDCl}_3$ ):  $\delta$  7.34 (d,  $J = 8.7$  Hz, 2H), 6.85 (d,  $J = 8.6$  Hz, 2H), 6.67 (dd,  $J = 10.6$  Hz,  $J = 15.3$  Hz, 1H), 6.54-6.37 (m, 2H), 5.28 (d,  $J = 16.7$  Hz, 1H), 5.11 (d,  $J = 9.3$  Hz, 1H), 3.81 (s, 3H).  $^{13}\text{C}$  NMR (75 MHz,  $\text{CDCl}_3$ ):  $\delta$  159.74, 137.84, 132.87, 130.39, 128.42, 128.12, 116.94, 114.53, 55.77. HRMS ( $\text{EI}^+$ ): calcd. for  $\text{C}_{11}\text{H}_{12}\text{O}$  ( $\text{M}^+$ ): 160.0888, found: 160.0888.

**((E)-5-but-1,3-dienyl)-benzo[1,3]dioxole (entry 5)** The title compound was obtained according to the general procedure. Colourless oil; Yield: 87%;  $^1\text{H}$  NMR (300 MHz,  $\text{CDCl}_3$ ):  $\delta$  6.94 (s, 1H), 6.82 (d,  $J = 8.0$  Hz, 1H), 6.74 (d,  $J = 7.9$  Hz, 1H), 6.62 (dd,  $J = 10.2$  Hz,  $J = 15.4$  Hz, 1H),

6.52-6.40 (m, 2H), 5.94 (s, 2H), 5.28 (d,  $J = 16.5$  Hz, 1H), 5.12 (d,  $J = 9.8$  Hz, 1H).  $^{13}\text{C}$  NMR (75 MHz,  $\text{CDCl}_3$ ):  $\delta$  148.52, 147.75, 137.60, 132.97, 132.09, 128.46, 121.83, 117.35, 108.81, 105.93, 101.54. IR (KBr) 3078, 2961, 2920, 1671, 1491, 1257, 1034, 930, 800, 669  $\text{cm}^{-1}$ . HRMS ( $\text{EI}^+$ ): calcd for  $\text{C}_{11}\text{H}_{10}\text{O}_2$  ( $\text{M}^+$ ): 174.0681, found: 174.0680.

**(E)-2-(buta-1,3-dienyl)furan (entry 6)** The title compound was obtained according to the general procedure. Colourless oil; Yield: 70%;  $^1\text{H}$  NMR (300 MHz,  $\text{CDCl}_3$ ):  $\delta$  7.36 (s, 1H), 6.70 (dd,  $J = 10.8$  Hz,  $J = 15.6$  Hz, 1H), 6.50-6.26(m, 4H), 5.32 (d,  $J = 16.8$  Hz, 1H), 5.15 (d,  $J = 10.0$  Hz, 1H).  $^{13}\text{C}$  NMR (75 MHz,  $\text{CDCl}_3$ ):  $\delta$  153.41, 142.66, 137.17, 128.67, 120.90, 118.27, 112.05, 109.04. IR (KBr) 3078, 1647, 1516, 1460, 1383, 1115, 670, 523, 469  $\text{cm}^{-1}$ . HRMS ( $\text{EI}^+$ ): calcd for  $\text{C}_8\text{H}_8\text{O}$  ( $\text{M}^+$ ): 120.0575, found: 120.0576.

**1-(penta-2,4-dien-2-yl)benzene (entry 7a)**<sup>[2]</sup> The title compound was obtained according to the general procedure. Colourless solid; Yield: 47%.  $^1\text{H}$  NMR (300 MHz,  $\text{CDCl}_3$ ):  $\delta$  7.46-7.21 (m, 5H), 6.76 (td,  $J = 10.5$  Hz,  $J = 16.7$  Hz, 1H), 6.46 (d,  $J = 11.0$  Hz, 1H), 5.32 (d,  $J = 16.7$  Hz, 1H), 5.19 (d,  $J = 10.0$  Hz, 1H), 2.17 (s, 3H).  $^{13}\text{C}$  NMR (75 MHz,  $\text{CDCl}_3$ ):  $\delta$  144.17, 143.43, 137.19, 134.02, 128.18, 127.64, 126.16, 118.09, 16.49. HRMS ( $\text{EI}^+$ ): calcd. for  $\text{C}_{11}\text{H}_{12}$  ( $\text{M}^+$ ): 144.0939, found : 144.0939.

**1-(penta-1,4-dien-2-yl)benzene (entry 7b)**<sup>[3]</sup> The title compound was obtained according to the general procedure. Colourless solid; Yield: 35%.  $^1\text{H}$  NMR (300 MHz,  $\text{CDCl}_3$ ):  $\delta$  7.46-7.21 (m, 5H), 5.90 (tdd,  $J = 6.6$  Hz,  $J = 10.1$  Hz,  $J = 16.7$  Hz, 1H), 5.39 (s, 1H), 5.14-5.05 (m, 3H), 3.25 (d,  $J = 6.5$  Hz, 2H).  $^{13}\text{C}$  NMR (75 MHz,  $\text{CDCl}_3$ ):  $\delta$  146.77, 141.39, 136.66, 128.74, 127.92, 126.46, 116.95, 113.63, 39.97. HRMS ( $\text{EI}^+$ ): calcd. for  $\text{C}_{11}\text{H}_{12}$  ( $\text{M}^+$ ): 144.0939, found: 144.0939.

**1-methyl-4-(1-phenylvinyl)benzene (entry 8)**<sup>[4]</sup> The title compound was obtained according to the general procedure. Colourless oil; Yield: 91%;  $^1\text{H}$  NMR (300 MHz,  $\text{CDCl}_3$ ):  $\delta$  7.33-7.29 (m, 5 H), 7.23 (d,  $J = 8.1$  Hz, 2H), 7.13 (d,  $J = 8.0$  Hz, 2H), 5.41 (d,  $J = 8.3$  Hz, 2H), 2.36 (s, 3H).  $^{13}\text{C}$  NMR (75 MHz,  $\text{CDCl}_3$ ):  $\delta$  150.35, 142.15, 139.07, 137.98, 129.68, 129.33, 128.76, 128.62, 128.11, 114.13, 21.66. HRMS ( $\text{EI}^+$ ): calcd. for  $\text{C}_{15}\text{H}_{14}$  ( $\text{M}^+$ ): 194.1096, found: 194.1096.

**1-chloro-4-(1-p-tolylvinyl)benzene (entry 9)**<sup>[5]</sup> The title compound was obtained according to the general procedure. Colourless oil; Yield: 86%;  $^1\text{H}$  NMR (300 MHz,  $\text{CDCl}_3$ ):  $\delta$  7.30-7.23 (m, 4H), 7.16 (dd,  $J = 8.1$  Hz,  $J = 20.0$  Hz, 4H), 5.42 (s, 1H), 5.38 (s, 1H), 2.36 (s, 3H).  $^{13}\text{C}$  NMR (75 MHz,  $\text{CDCl}_3$ ):  $\delta$  149.29, 140.61, 138.60, 138.24, 133.97, 130.05, 129.44, 128.77, 128.55, 114.50, 21.65. HRMS ( $\text{EI}^+$ ): calcd. for  $\text{C}_{15}\text{H}_{13}^{35}\text{Cl}$  ( $\text{M}^+$ ): 228.0706, found: 228.0706 ; calcd. for  $\text{C}_{15}\text{H}_{13}^{37}\text{Cl}$  ( $\text{M}^+$ ): 230.0676, found: 230.0657.

**4,4'-(ethene-1,1-diyl)bis(methylbenzene) (entry 10)**<sup>[6]</sup> The title compound was obtained according to the general procedure. Colourless oil; Yield: 90%;  $^1\text{H}$  NMR (300 MHz,  $\text{CDCl}_3$ ):  $\delta$  7.23 (d,  $J = 7.9$  Hz, 4H), 7.13 (d,  $J = 7.8$  Hz, 4H), 5.37 (s, 2H), 2.36 (s, 6H).  $^{13}\text{C}$  NMR (75 MHz,  $\text{CDCl}_3$ ):  $\delta$  150.20, 139.27, 137.90, 129.29, 128.65, 113.48, 21.66. HRMS ( $\text{EI}^+$ ): calcd. for  $\text{C}_{16}\text{H}_{16}$  ( $\text{M}^+$ ): 208.1252, found: 208.1252.

**2-(1-p-tolylvinyl)naphthalene (entry 11)**<sup>[7]</sup> The title compound was obtained according to the general procedure. Colourless oil; Yield: 81%;  $^1\text{H}$  NMR (300 MHz,  $\text{CDCl}_3$ ):  $\delta$  7.82-7.76(m, 4H), 7.49-7.41 (m, 3H), 7.27 (d,  $J = 8.1$  Hz, 2H), 7.15 (d,  $J = 8.0$  Hz, 2H), 5.52 (d,  $J = 2.5$  Hz, 2H), 2.37 (s, 3H).  $^{13}\text{C}$  NMR (75MHz,  $\text{CDCl}_3$ ):  $\delta$  150.33, 139.54, 139.07, 138.07, 133.74, 133.40, 129.40, 128.73, 128.63, 128.09, 128.05, 127.72, 126.96, 126.58, 126.43, 114.68, 21.68. HRMS ( $\text{EI}^+$ ): calcd. for  $\text{C}_{19}\text{H}_{16}$  ( $\text{M}^+$ ): 244.1252, found: 244.1252.

**2-(1-p-tolylvinyl)thiophene (entry 12)**<sup>[8]</sup> The title compound was obtained according to the general procedure. Colourless oil; Yield: 89%;  $^1\text{H}$  NMR (300 MHz,  $\text{CDCl}_3$ ):  $\delta$  7.38 (d,  $J = 8.1$  Hz, 2H), 7.26 (dd,  $J = 1.1$  Hz,  $J = 5.0$  Hz, 1H), 7.21 (d,  $J = 7.9$  Hz, 2H), 7.01 (dd,  $J = 3.6$  Hz,  $J = 5.0$  Hz, 1H), 6.96 (dd,  $J = 1.0$  Hz,  $J = 3.5$  Hz, 1H), 5.58 (s, 1H), 5.26 (s, 1H), 2.42 (s, 3H).  $^{13}\text{C}$  NMR (75 MHz,  $\text{CDCl}_3$ ):  $\delta$  145.43, 143.65, 138.62, 138.36, 129.33, 128.66, 127.70, 126.82, 125.41, 113.59, 21.69. HRMS ( $\text{EI}^+$ ): calcd. for  $\text{C}_{13}\text{H}_{12}\text{S}$  ( $\text{M}^+$ ): 200.0660, found: 200.0660.

**2-(1-p-tolylvinyl)furan (entry 13)** The title compound was obtained according to the general procedure. Colourless oil; Yield: 61%;  $^1\text{H}$  NMR (300 MHz,  $\text{CDCl}_3$ ):  $\delta$  7.42 (s, 1H), 7.33 (d,  $J = 8.0$  Hz, 2H), 7.17 (d,  $J = 7.9$  Hz, 2H), 6.37 (dd,  $J = 1.8$  Hz,  $J = 3.2$  Hz, 1H), 6.37 (dd,  $J = 1.8$  Hz,  $J = 3.2$  Hz, 1H), 5.70 (s, 1H), 5.20 (s, 1H), 2.37 (s, 3H).  $^{13}\text{C}$  NMR (75 MHz,  $\text{CDCl}_3$ ):  $\delta$  154.67, 142.79, 139.57, 138.29, 137.15, 129.38, 128.63, 112.03, 111.69, 109.50, 21.68. IR (KBr) 3048 ,2926, 1728, 1684, 1511, 1459, 1178, 1110, 815, 745, 518  $\text{cm}^{-1}$ . HRMS ( $\text{EI}^+$ ): calcd. for  $\text{C}_{13}\text{H}_{12}\text{O}$  ( $\text{M}^+$ ): 184.0888, found: 184.0887.

**2-(1-phenylvinyl)thiophene (entry 14)**<sup>[4]</sup> The title compound was obtained according to the general procedure. Colourless oil; Yield: 92%;  $^1\text{H}$  NMR (300 MHz,  $\text{CDCl}_3$ ):  $\delta$  7.45-7.42 (m, 2H), 7.37-7.34 (m, 3H), 7.22 (dd,  $J = 0.9$  Hz,  $J = 5.0$  Hz, 1H), 6.96 (dd,  $J = 3.6$  Hz,  $J = 5.0$  Hz, 1H), 6.91-6.90 (m, 1H), 5.58 (s, 1H), 5.24 (s, 1H).  $^{13}\text{C}$  NMR (75 MHz,  $\text{CDCl}_3$ ):  $\delta$  145.24, 143.83, 141.50, 128.78, 128.65, 128.53, 127.74, 126.94, 125.50, 114.10. HRMS ( $\text{EI}^+$ ): calcd. for  $\text{C}_{12}\text{H}_{10}\text{S}$  ( $\text{M}^+$ ): 186.0503, found: 186.0503.

**2-(1-(4-bromophenyl)vinyl)thiophene (entry 15)** The title compound was obtained according to the general procedure. Colourless oil; Yield: 94%;  $^1\text{H}$  NMR (300 MHz,  $\text{CDCl}_3$ ):  $\delta$  7.48 (d,  $J = 8.4$  Hz, 2H), 7.30 (d,  $J = 8.4$  Hz, 2H), 7.23 (d,  $J = 4.9$  Hz, 1H), 6.98-6.95 (m, 1H), 6.87 (d,  $J = 3.4$  Hz, 1H), 5.57 (s, 1H), 5.22 (s, 1H).  $^{13}\text{C}$  NMR (75 MHz,  $\text{CDCl}_3$ ):  $\delta$  144.61, 142.78, 140.40, 131.82, 130.41, 127.82, 127.00, 125.79, 122.60, 114.49. IR (KBr) 3082, 1591, 1485, 1392, 1228, 1073, 1009, 830, 702, 556, 463  $\text{cm}^{-1}$ . HRMS ( $\text{EI}^+$ ): calcd. for  $\text{C}_{12}\text{H}_9^{79}\text{BrS}$  ( $\text{M}^+$ ): 263.9608, found: 263.9606; calcd. for  $\text{C}_{12}\text{H}_9^{81}\text{BrS}$  ( $\text{M}^+$ ): 265.9588, found: 265.9576.

**2-(1-p-tolylvinyl)thiophene (entry 16)**<sup>[8]</sup> The title compound was obtained according to the general procedure. Colourless oil; Yield: 90%;  $^1\text{H}$  NMR (300 MHz,  $\text{CDCl}_3$ ):  $\delta$  7.38 (d,  $J = 8.1$  Hz, 2H), 7.26 (dd,  $J = 1.1$  Hz,  $J = 5.0$  Hz, 1H), 7.21 (d,  $J = 7.9$  Hz, 2H), 7.02-6.95 (m, 2H), 5.58 (s,

1H), 5.26 (s, 1H), 2.42 (s, 3H). <sup>13</sup>C NMR (75 MHz, CDCl<sub>3</sub>): δ 145.43, 143.65, 138.62, 138.36, 129.33, 128.66, 127.70, 126.82, 125.41, 113.59, 21.69. HRMS (EI<sup>+</sup>): calcd. for C<sub>13</sub>H<sub>12</sub>S (M<sup>+</sup>): 200.0660, found: 200.0660.

**2-(3H-inden-1-yl)thiophene (entry 17)** The title compound was obtained according to the general procedure. Colourless oil; Yield: 87%; <sup>1</sup>H NMR (300 MHz, CDCl<sub>3</sub>): δ 7.78 (d, *J* = 7.6 Hz, 1H), 7.50 (d, *J* = 7.3 Hz, 1H), 7.40-7.20 (m, 4H), 7.11 (dd, *J* = 3.6 Hz, *J* = 5.0 Hz, 1H), 6.68 (t, *J* = 2.1 Hz, 1H), 3.49 (s, 2H). <sup>13</sup>C NMR (75 MHz, CDCl<sub>3</sub>): δ 145.01, 143.52, 138.47, 138.31, 131.36, 127.93, 126.78, 125.63, 124.94, 124.78, 124.54, 120.91, 38.62. IR (KBr) 3069, 2924, 1642, 1462, 1294, 1113, 1045, 837, 700 cm<sup>-1</sup>. HRMS (EI<sup>+</sup>): calcd. for C<sub>13</sub>H<sub>10</sub>S (M<sup>+</sup>): 198.0503, found: 198.0503.

**2-cyclopentenylthiophene (entry 18)**<sup>[9]</sup> The title compound was obtained according to the general procedure. Colourless oil; Yield: 91%; <sup>1</sup>H NMR (300 MHz, CDCl<sub>3</sub>): δ 7.12 (d, *J* = 4.9 Hz, 1H), 6.96-6.90 (m, 2H), 6.02-6.01 (m, 1H), 2.73-2.67 (m, 2H), 2.53-2.47 (m, 2H), 2.05-1.95 (m, 2H). <sup>13</sup>C NMR (75 MHz, CDCl<sub>3</sub>): δ 141.74, 137.12, 127.63, 126.23, 124.10, 123.77, 34.71, 33.74, 23.88. HRMS (EI<sup>+</sup>): calcd. for C<sub>9</sub>H<sub>10</sub>S (M<sup>+</sup>): 150.0503 found: 150.0503.

**2-cyclohexenylthiophene (entry 19)**<sup>[10]</sup> The title compound was obtained according to the general procedure. Colourless oil; Yield: 84%; <sup>1</sup>H NMR (300 MHz, CDCl<sub>3</sub>): δ 7.07 (d, *J* = 3.7 Hz, 1H), 6.97-6.94 (m, 2H), 6.19 (t, *J* = 3.8 Hz, 1H), 2.41-2.39 (m, 2H), 2.20-2.16 (m, 2H), 1.80-1.72 (m, 2H), 1.67-1.60 (m, 2H). <sup>13</sup>C NMR (75 MHz, CDCl<sub>3</sub>): δ 147.54, 131.60, 127.55, 124.49, 123.04, 121.44, 28.02, 26.08, 23.21, 22.60. HRMS (EI<sup>+</sup>): calcd. for C<sub>10</sub>H<sub>12</sub>S (M<sup>+</sup>): 164.0660, found: 164.0660

**1,1-diphenylbut-1-ene (entry 20)**<sup>[11]</sup> The title compound was obtained according to the general procedure. Colourless oil; Yield: 82%; <sup>1</sup>H NMR (300 MHz, CDCl<sub>3</sub>): δ 7.39-7.17 (m, 10H), 6.07 (t, *J* = 7.5 Hz, 1H), 2.17-2.07 (m, 2H), (t, *J* = 7.5 Hz, 3H). <sup>13</sup>C NMR (75 MHz, CDCl<sub>3</sub>): δ 132.23, 130.38, 128.58, 127.69, 127.30, 127.23, 23.69, 15.01. HRMS (EI<sup>+</sup>): calcd. for C<sub>16</sub>H<sub>16</sub> (M<sup>+</sup>): 208.1252, found: 208.1260.

**(E)-1-(but-1-enyl)-4-methoxybenzene (entry 21)**<sup>[12]</sup> The title compound was obtained according to the general procedure. Colourless oil; Yield: 90%; <sup>1</sup>H NMR (300 MHz, CDCl<sub>3</sub>): δ 7.27 (d, *J* = 8.6 Hz, 2H), 6.83 (d, *J* = 8.7 Hz, 2H), 6.32 (d, *J* = 15.8 Hz, 1H), 6.12 (td, *J* = 6.4 Hz, *J* = 15.7 Hz, 1H), 3.79 (s, 3H), 2.20 (p, *J* = 6.4 Hz, 2H), 1.08 (t, *J* = 7.4 Hz, 3H). <sup>13</sup>C NMR (75 MHz, CDCl<sub>3</sub>): δ 159.03, 131.23, 130.99, 128.55, 127.42, 114.35, 55.74, 26.51, 14.28. HRMS (EI<sup>+</sup>): calcd. for C<sub>11</sub>H<sub>14</sub>O (M<sup>+</sup>): 162.1045, found: 162.1047.

**((E)-5-but-1-enyl)-benzo[1,3]dioxole (entry 22)**<sup>[13]</sup> The title compound was obtained according to the general procedure. Colourless oil; Yield: 84%; <sup>1</sup>H NMR (300 MHz, CDCl<sub>3</sub>): δ 6.90 (s, 1H), 6.80-6.72 (m, 2H), 6.29 (d, *J* = 15.8 Hz, 1H), 6.09 (td, *J* = 6.4 Hz, *J* = 15.8 Hz, 1H), 5.93 (s, 2H), 2.25-2.15 (m, 2H), 1.07 (t, *J* = 7.4 Hz, 3H). <sup>13</sup>C NMR (75 MHz, CDCl<sub>3</sub>): δ 148.36, 146.96, 132.93, 131.41, 128.76, 120.65, 108.68, 105.82, 101.37, 26.43, 14.15. HRMS (EI<sup>+</sup>): calcd. for C<sub>11</sub>H<sub>12</sub>O<sub>2</sub> (M<sup>+</sup>): 176.0837, found: 176.0836.

**2-Ethylidene-adamantane (entry 23)**<sup>[14]</sup> The title compound was obtained according to the general procedure. Colourless oil; Yield: 43%; <sup>1</sup>H NMR (400 MHz, CDCl<sub>3</sub>): δ 5.08 (q, *J* = 6.7 Hz, 1H), 2.84 (s, 1H), 2.32 (s, 1H), 1.94-1.67 (m, 12H), 1.55 (d, *J* = 6.7 Hz, 3H). <sup>13</sup>C NMR (100 MHz, CDCl<sub>3</sub>): δ 148.50, 110.27, 40.95, 40.26, 39.17, 37.79, 32.03, 29.12, 12.54. HRMS (EI<sup>+</sup>): calcd. for C<sub>12</sub>H<sub>18</sub> (M<sup>+</sup>): 162.1409 found: 162.1408.

**1-methoxy-4-(1-(4-methoxyphenyl)-2-phenylvinyl)benzene (entry 24)**<sup>[15]</sup> The title compound was obtained according to the general procedure. Colourless solid; Yield: 90%; <sup>1</sup>H NMR (300 MHz, CDCl<sub>3</sub>): δ 7.26 (d, *J* = 8.8 Hz, 2H), 7.16-7.03 (m, 7H), 6.84 (dd, *J* = 2.4 Hz, *J* = 9.0 Hz, 5H), 3.82 (s, 3H), 3.80 (s, 3H). <sup>13</sup>C NMR (75 MHz, CDCl<sub>3</sub>): δ 158.77, 139.50, 136.51, 132.07, 131.40, 129.87, 129.33, 128.47, 128.00, 127.87, 127.15, 114.41, 113.99, 113.75, 55.69, 48.64. HRMS (EI<sup>+</sup>): calcd. for C<sub>22</sub>H<sub>20</sub>O<sub>2</sub> (M<sup>+</sup>): 316.1463, found: 316.1462.

**(E)-3,4-methylenedioxy stilbene (entry 25)**<sup>[16]</sup> The title compound was obtained according to the general procedure. Colourless solid; Yield: 90%; <sup>1</sup>H NMR (300 MHz, CDCl<sub>3</sub>): δ 7.48 (d, *J* = 7.4 Hz, 2H), 7.34 (t, *J* = 7.5 Hz, 2H), 7.26-7.21 (m, 1H), 7.07-7.05 (m, 1H), 6.98 (d, *J* = 14.4 Hz, 2H), 6.93-6.90 (m, 1H), 6.80 (d, *J* = 8.0 Hz, 1H), 5.97 (s, 2H). <sup>13</sup>C NMR (75 MHz, CDCl<sub>3</sub>): δ 148.60, 147.77, 137.83, 132.31, 129.14, 128.78, 127.84, 127.44, 126.77, 121.96, 108.88, 105.98, 101.60. HRMS (EI<sup>+</sup>): calcd. for C<sub>15</sub>H<sub>12</sub>O<sub>2</sub> (M<sup>+</sup>): 224.0837, found: 224.0837.

**(1E,3E)-1,4-diphenylbuta-1,3-diene (entry 26)**<sup>[17]</sup> The title compound was obtained according to the general procedure. Colourless solid; Yield: 81%; <sup>1</sup>H NMR (300 MHz, CDCl<sub>3</sub>): δ 7.44 (d, *J* = 7.3 Hz, 4H), 7.33 (t, *J* = 7.4 Hz, 4H), 7.26-7.21 (m, 2H), 6.96 (dd, 1H, *J* = 2.8 Hz, *J* = 12.0 Hz, 1H), 6.67 (dd, *J* = 2.7 Hz, *J* = 12.0 Hz, 1H). <sup>13</sup>C NMR (75 MHz, CDCl<sub>3</sub>): δ 137.79, 133.28, 129.70, 129.14, 128.05, 126.85. HRMS (EI<sup>+</sup>): calcd. for C<sub>16</sub>H<sub>14</sub> (M<sup>+</sup>): 206.1096, found: 206.1099.

**1,2,3-triphenylprop-1-ene (entry 27)**<sup>[18]</sup> The title compound was obtained according to the general procedure. Colourless solid; Yield: 70%; <sup>1</sup>H NMR (300 MHz, CDCl<sub>3</sub>): δ 7.49 (d, *J* = 7.1 Hz, 2H), 7.36-7.15 (m, 13H), 7.12 (s, 1H; trans), 6.43 (s, 1H; cis), 4.13 (s, 2H; trans), 3.77 (s, 2H; cis). <sup>13</sup>C NMR (75 MHz, CDCl<sub>3</sub>): δ 142.83, 140.12, 139.43, 138.16, 130.79, 129.72, 129.50, 129.04, 128.98, 128.84, 128.30, 127.76, 127.45, 126.94, 126.41, 47.40 (cis), 36.53 (trans). HRMS (EI<sup>+</sup>): calcd. for C<sub>21</sub>H<sub>18</sub> (M<sup>+</sup>): 270.1409, found: 270.1407.

**2,4-diphenylbut-1-en-3-yne (entry 28)**<sup>[19]</sup> The title compound was obtained according to the general procedure. Colourless oil; Yield: 72%; <sup>1</sup>H NMR (300 MHz, CDCl<sub>3</sub>): δ 7.72 (d, *J* = 7.5 Hz, 2H), 7.53 (d, *J* = 3.8 Hz, 2H), 7.44-7.22 (m, 6H), 5.98 (s, 1H), 5.76 (s, 1H). <sup>13</sup>C NMR (75 MHz, CDCl<sub>3</sub>): δ 137.72, 132.97, 132.14, 131.07, 129.68, 128.89, 128.83, 126.57, 123.56, 121.16, 91.26, 89.03. HRMS (EI<sup>+</sup>): calcd. for C<sub>16</sub>H<sub>12</sub> (M<sup>+</sup>): 204.0939, found: 204.0940.

**1-methyl-4-(4-phenylbut-1-en-3-yn-2-yl)benzene (entry 29)** The title compound was obtained according to the general procedure. Colourless oil; Yield: 83%; <sup>1</sup>H NMR (300 MHz, CDCl<sub>3</sub>): δ 7.61 (d, *J* = 8.1 Hz, 2H), 7.52 (dd, *J* = 2.8 Hz, *J* = 6.6 Hz, 2H), 7.33 (dd, *J* = 1.8 Hz, *J* = 4.9 Hz, 3H), 7.18 (d, *J* = 8.0 Hz, 2H), 5.93 (s, 1H), 5.70 (s, 1H), 2.36 (s, 3H). <sup>13</sup>C NMR (75 MHz, CDCl<sub>3</sub>): δ 138.74, 134.95, 132.97, 132.14, 130.89, 129.58,

128.82, 126.47, 123.65, 120.28, 91.05, 89.22, 21.66. IR (KBr). 3057, 2974, 2861, 2199, 1603, 1512, 1448, 1277, 1176, 1025, 911, 818, 757, 693, 528 $\text{cm}^{-1}$ . HRMS (EI<sup>+</sup>): calcd. for C<sub>17</sub>H<sub>14</sub> (M<sup>+</sup>): 218.1096, found: 218.1100.

<sup>1</sup>H and <sup>13</sup>C NMR spectrums

entry 5

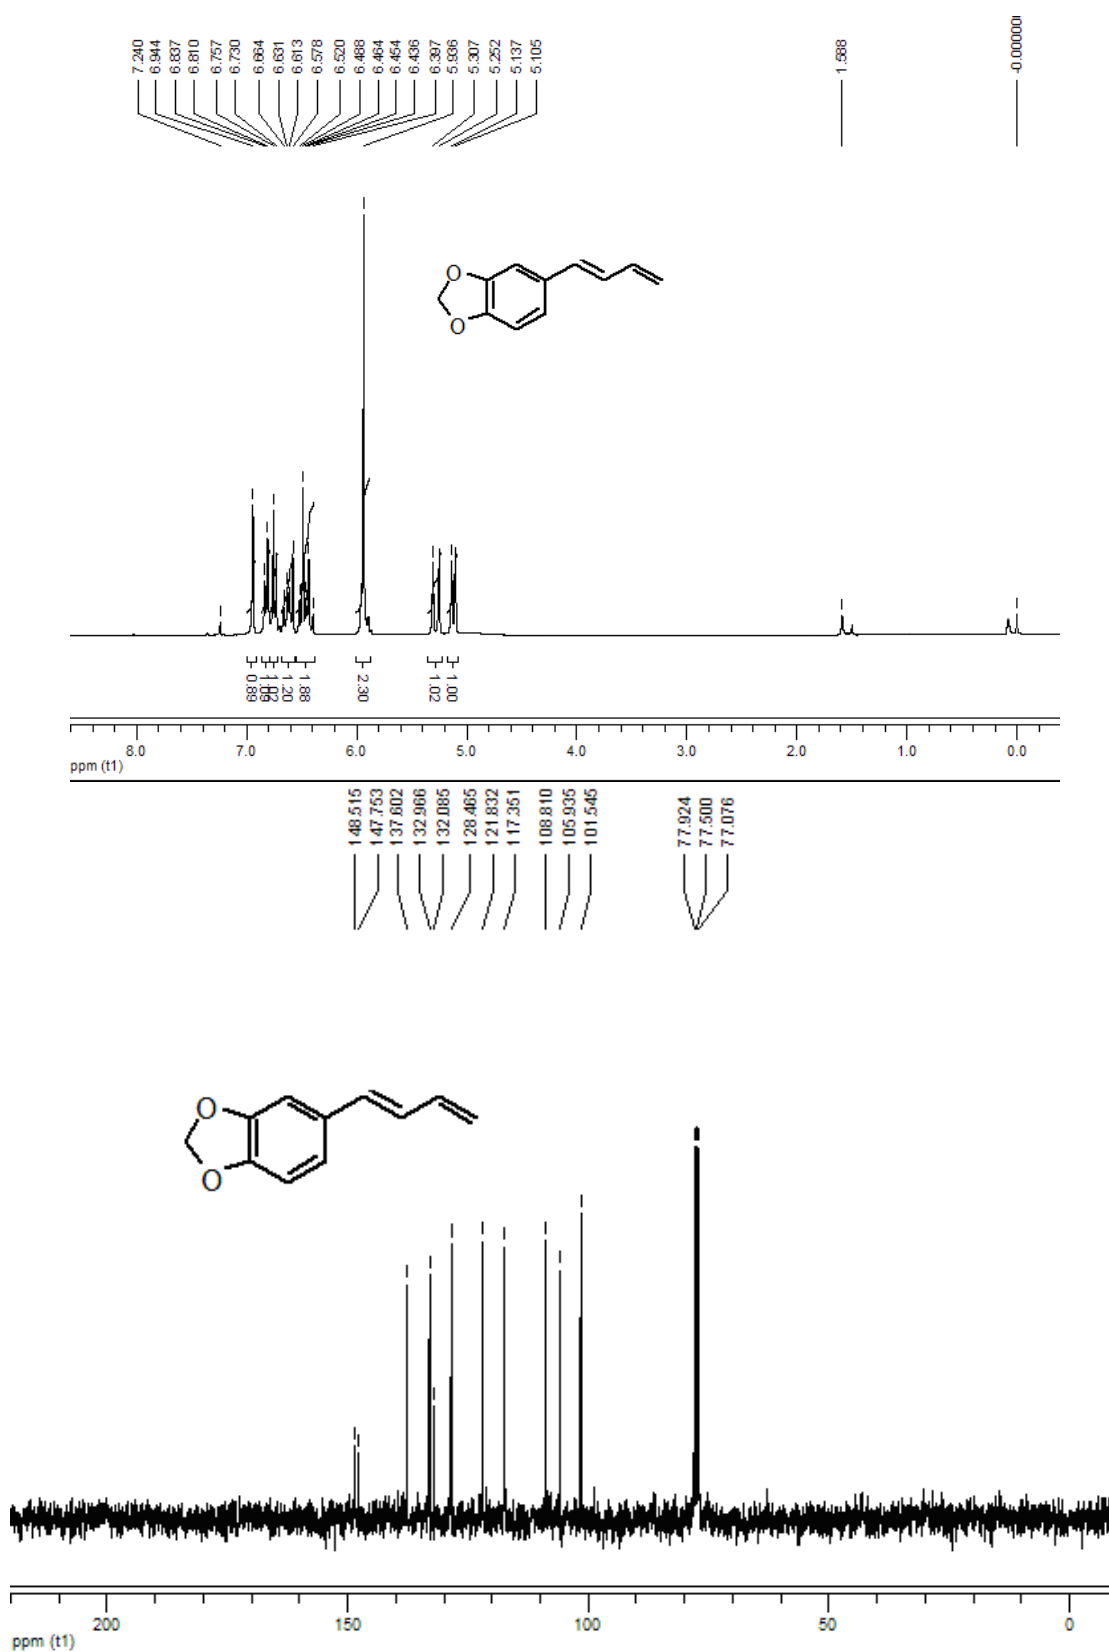

entry 6

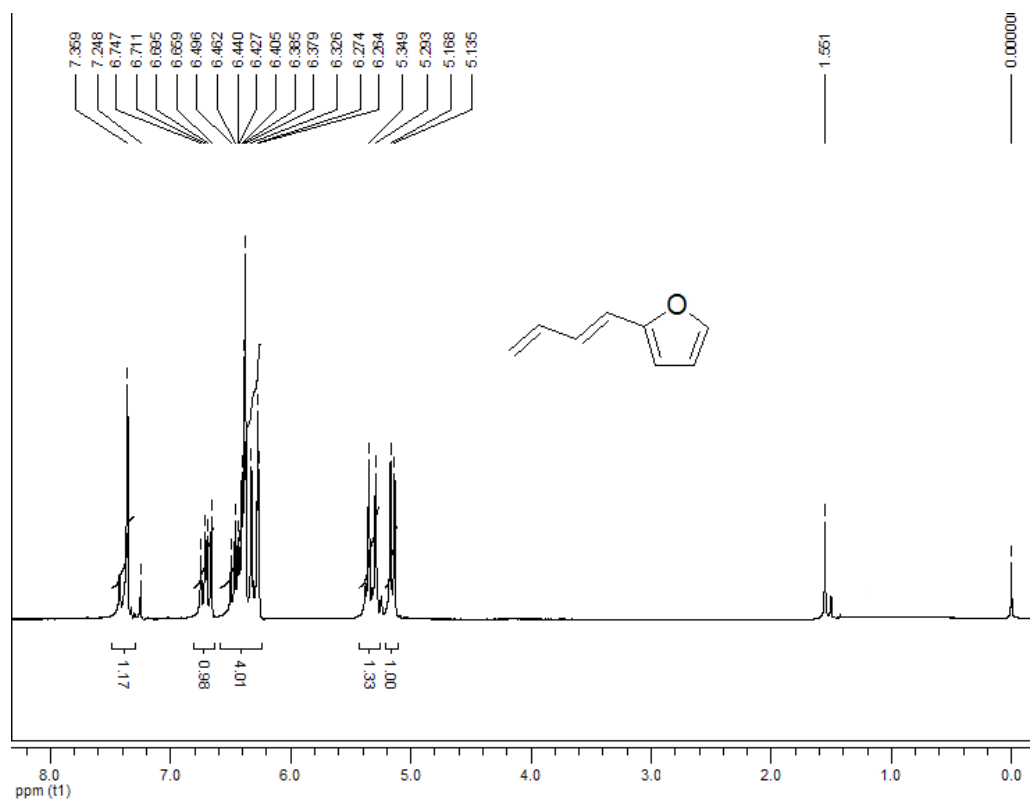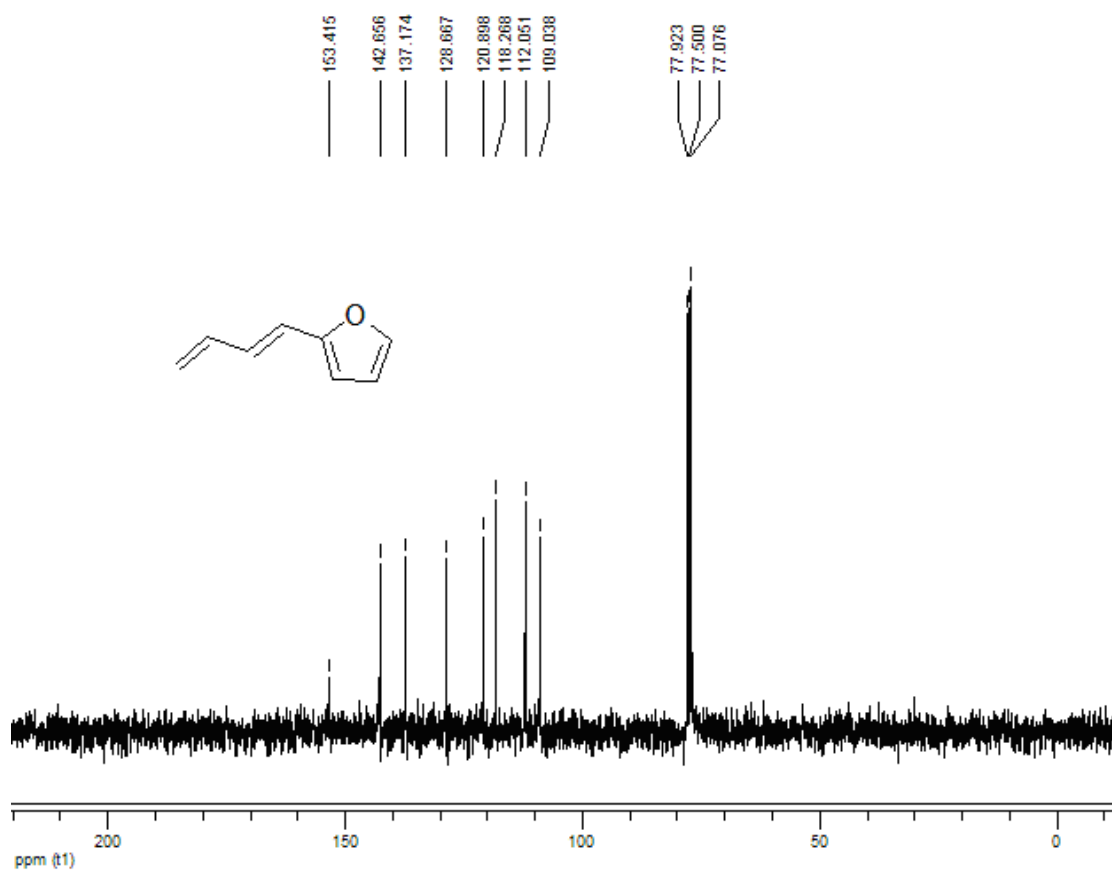

entry 13

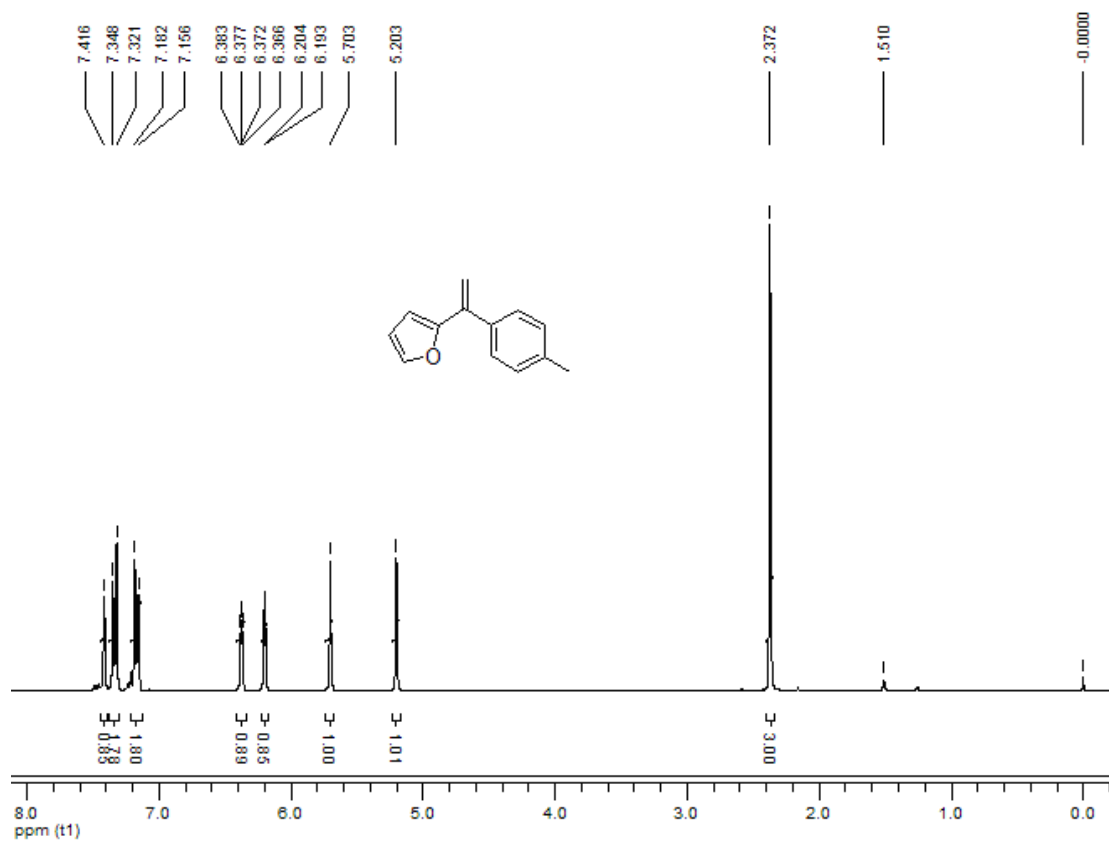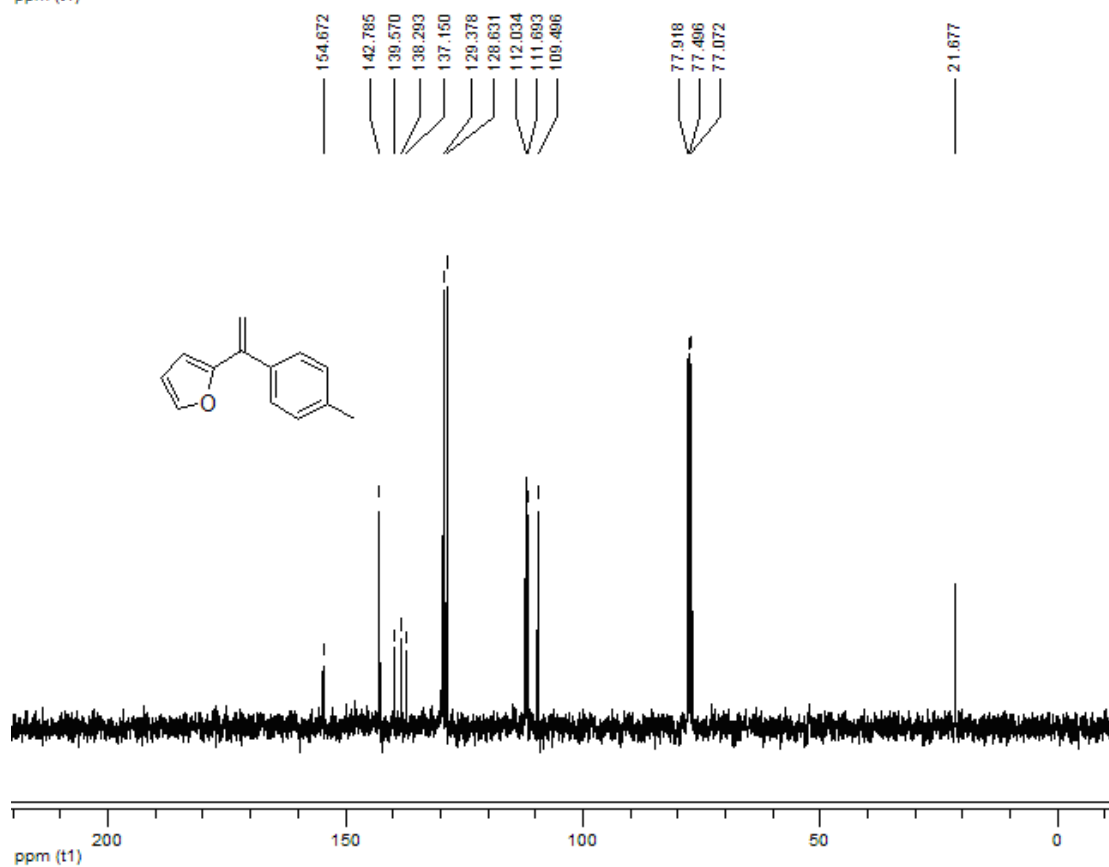

entry 15

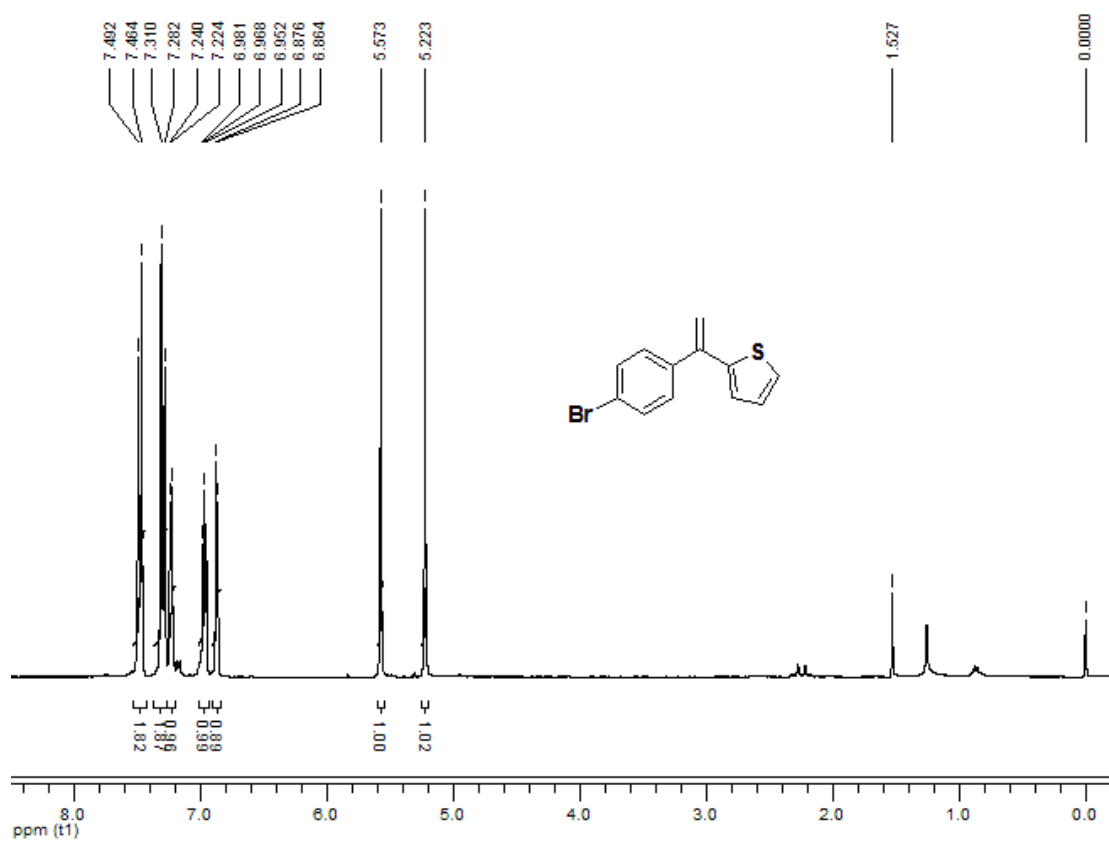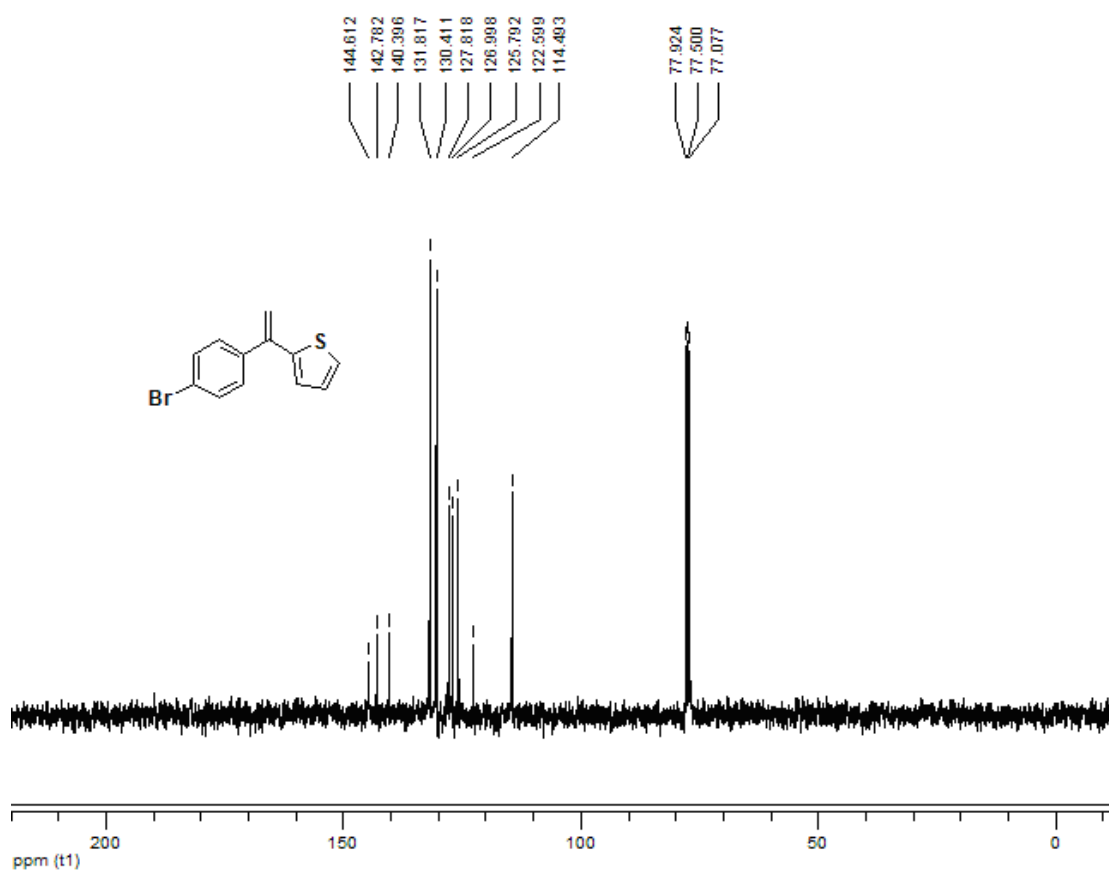

entry 17

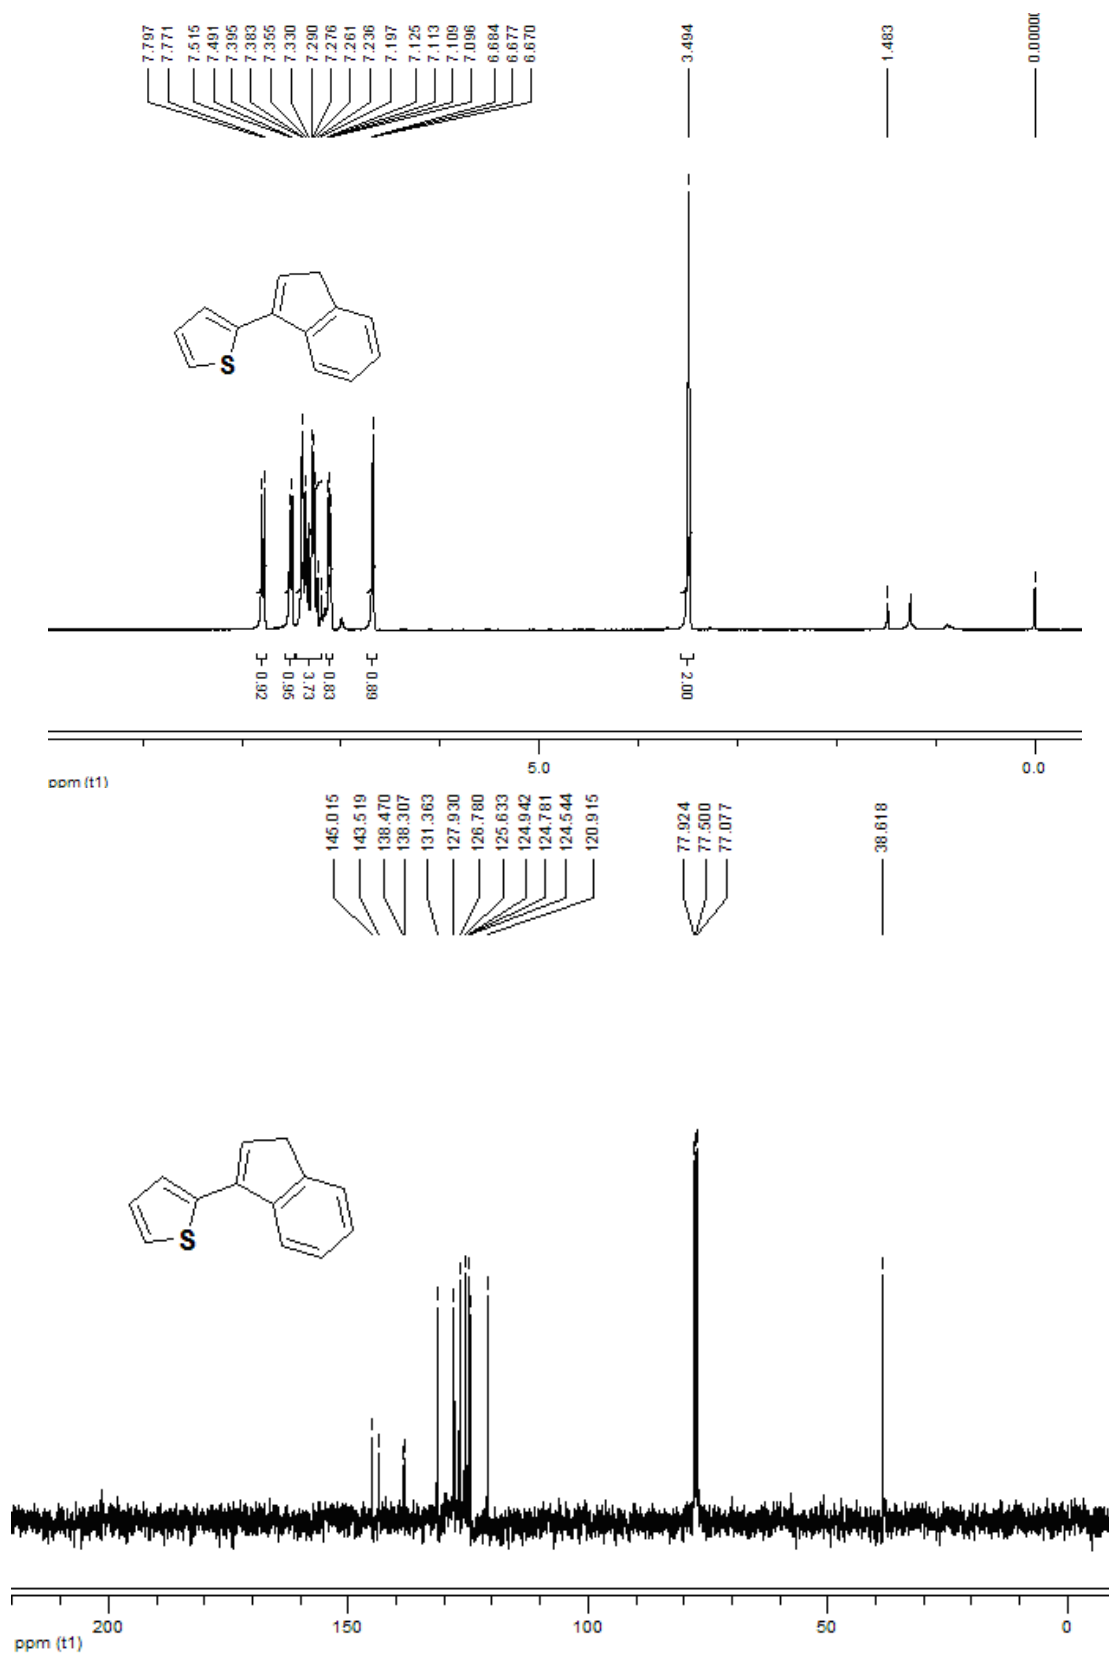



entry 29

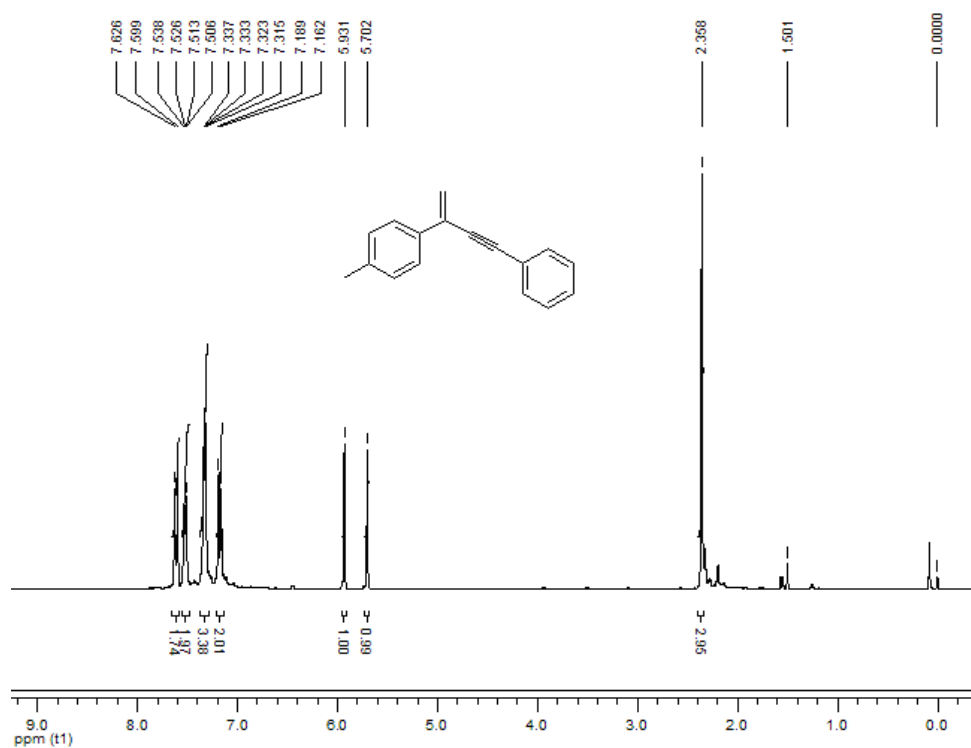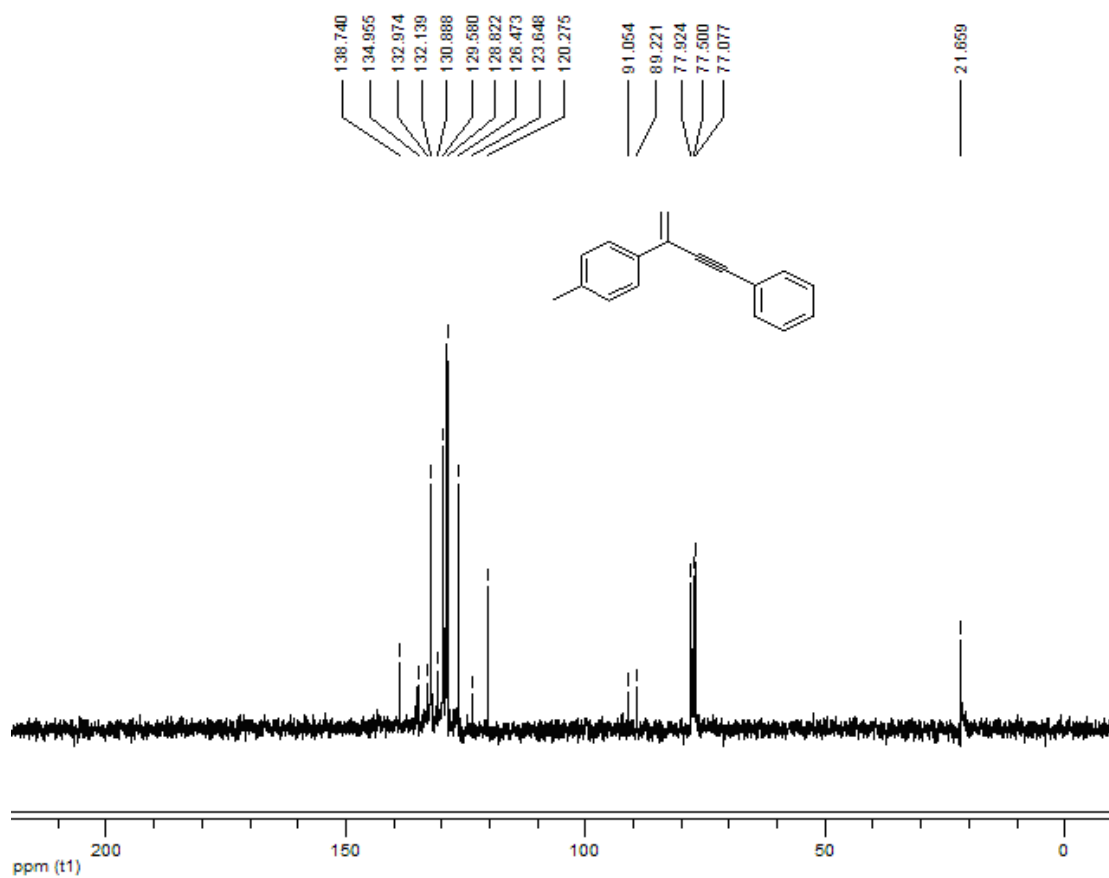

## References

- [1] M. Shi, B. Y. Wang, J. W. Huang, *J. Org. Chem.* **2005**, *70*, 5606-5610.
- [2] K. L. Yeh, B. Liu, C. Y. Lo, H.L. Huang, R. S. Liu, *J. Am. Chem. Soc.* **2002**, *124*, 6510-6511.
- [3] P. L. Lee, Y. K. Heo, D. Seomoon, S. Kim, K. Lee, *Chem. Commun.* **2005**, *14*, 1874-1876.
- [4] D. Xing, B. Cuan, G. Cai, Z. Shi, *Org. Lett.* **2006**, *8*, 693-696.
- [5] V. L. Sokolov, et al, *J. Organomet. Chem.* **1978**, *162*, 271-284.
- [6] K. Okuma, K. Kojima, K. Oyama, K. Kubo, K. Shioji, *Eur. J. Org. Chem.* **2004**, *4*, 820-825.
- [7] B. Ganchev, P. Bertus, J. Szymoniak, *Synlett.* **2001**, *1*, 123 – 125.
- [8] K. Maruyama, T. Otsuki, K. Mitsui, M. Tojo, *J. Heterocyclic Chem.* **1980**, *17*, 695-700.
- [9] W. Su, S. Urgaonkar, P. A. Mclaughlin, J. G. Verkade, *J. Am. Chem. Soc.* **2004**, *126*, 16433-16439.
- [10] D. Y. Yuan, Y. Q. Tu, C. A. Fan, *J. Org. Chem.* **2008**, *73*, 7797-7799.
- [11] S. Asaoka, T. Kitazawa, T. Wada, Y. Znoue, *J. Am. Chem. Soc.* **1999**, *121*, 8486-8498
- [12] A. G. Bessmertnykh, K. A. Blinov, Yu. K. Grishin, N. A. Donskaya, E. V. Tveritina, N. M. Yureva, I. P. Beletskaya, *J. Org. Chem.* **1997**, *62*, 6069-6076
- [13] D. Seebach, H. Schaefer, B. Schmidt, M. Schreiber, *Angewandte Chemie.* **1992**, *104*, 1680-1681.
- [14] D. T. Stoelting, V. J. Shiner, *J. Am. Chem. Soc.* **1993**, *115*, 1695-1705.
- [15] R. Apeloig, *J. Am. Chem. Soc.* **1969**, *91*, 6734.
- [16] S. Chandrasekhar, C. Narsihmulu, S. S. Sultana, N. R. Reddy, *Org. Lett.* **2002**, *4*, 4399-4401.
- [17] A. Cella, H. A. Stetani, A. T. G. Orfao, *Tetrahedron Lett.* **2006**, *47*, 5075-5078.
- [18] H. A. Dabbagh, J. M. Salehi, *J. Org. Chem.* **1998**, *63*, 7619-7627.
- [19] A. K. Dash, M. S. Eisen, *Org. Lett.* **2006**, *2*, 737-740.
